# Supplementary material for: Two-dimensional Dirac spin-gapless semiconductors with tunable perpendicular magnetic anisotropy and a robust quantum anomalous Hall effect
Source: Royal Society of Chemistry journal article supplement (doi:10.1039/d0mh00396d), 2020-01-01
Supplement: d0mh00396d1.pdf [file d0mh00396d1.pdf]

## Supplementary Information

**Table S1.** Calculated equilibrium lattice constant ( $a$ , Å), bond length of Fe-I ( $l_{Fe-I}$ , Å), angle of the I-Fe-I ( $\angle\alpha$ , °), magnetic moment of Fe ( $M$ ,  $\mu_B$ ), cohesive energy ( $E_{coh}$ , eV/atom), and exchange energy with DFT+ $U$  and HSE functional, respectively ( $E_{exc} = E_{AFM} - E_{FM}$ , meV).

|                                    | $a$  | $l_{Fe-I}$ | $\angle\alpha$ | $M$ | $E_{coh}$ | $E_{exc}$ (DFT+ $U$ ) | $E_{exc}$ (HSE) |
|------------------------------------|------|------------|----------------|-----|-----------|-----------------------|-----------------|
| <b>Fe<sub>2</sub>I<sub>2</sub></b> | 3.81 | 2.68       | 90.34          | ~3  | 3.01      | 516                   | 478             |

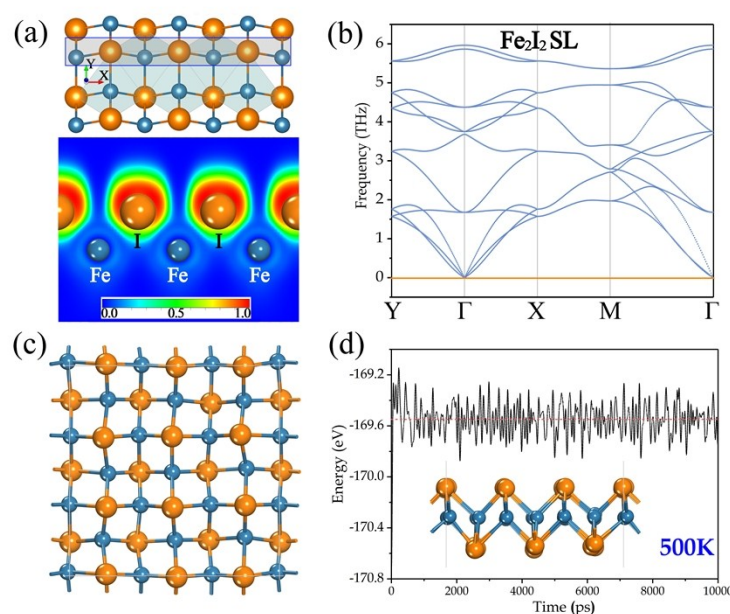

**Figure S1.** (a) Electron localization function (ELF); ELF = 1.0 (red) and 0.0 (blue) indicate accumulated and vanishing electron density, respectively. (b) Harmonic phonon analysis of SL Fe<sub>2</sub>I<sub>2</sub>. (c) Snapshot of SL Fe<sub>2</sub>I<sub>2</sub> at the end of MD simulation at 500 K after 10 ps. (d) Changes of the total energy with the trajectory time, obtained from MD simulations of SL Fe<sub>2</sub>I<sub>2</sub> at 500 K.

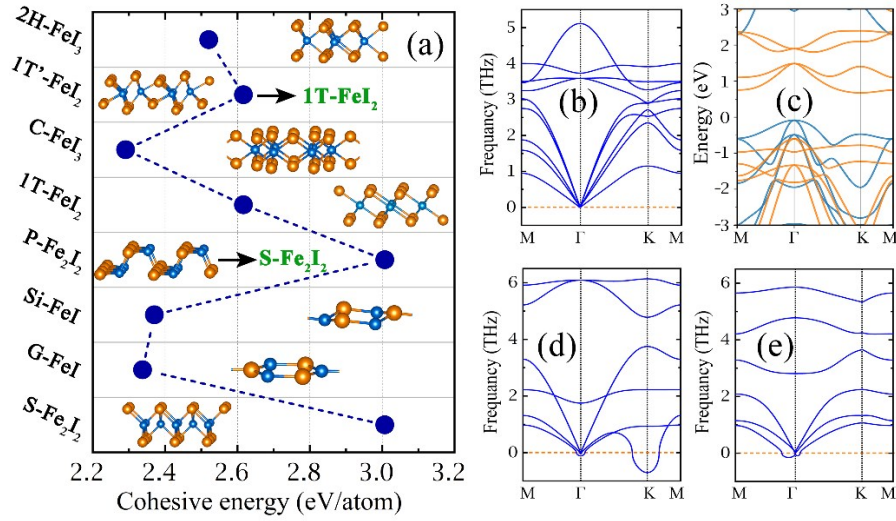

**Figure S2.** (a) Calculated cohesive energy ( $E_{coh}$ , eV/atom) for a wide range of 2D  $\text{Fe}_x\text{I}_y$  binary materials where the insets show their corresponding crystal structures. The 1T'- $\text{FeI}_2$  and P- $\text{Fe}_2\text{I}_2$  structures, denoted by the horizontal black arrows, undergo structural phase transitions to the 1T- $\text{FeI}_2$  and S- $\text{Fe}_2\text{I}_2$  structures, respectively, after geometry relaxation. (b) Calculated phonon dispersion curves of the proposed 2H- $\text{FeI}_2$ . (c) Minority (Orange line) and majority (blue line) spin-resolved band structure of the 2H- $\text{FeI}_2$  layer. (d) and (e) Phonon dispersion curves of the proposed G-FeI, and Si-FeI layers, respectively.

In order to determine the ground state of the 2D  $\text{Fe}_x\text{I}_y$  binary materials, we have constructed seven additional possible configurations based on the conventional prototypes of 2D material family. As shown in Figure S2, these additional 2D  $\text{Fe}_x\text{I}_y$  crystals include the graphene-like FeI (denoted as G-FeI), silicene-like FeI (Si-FeI), phosphorene-like FeI (P- $\text{Fe}_2\text{I}_2$ ), 1T-MoS<sub>2</sub>-like FeI<sub>2</sub> (1T- $\text{FeI}_2$ ), CrI<sub>3</sub>-like FeI<sub>3</sub> (C- $\text{FeI}_3$ ), 1T'-WTe<sub>2</sub>-like FeI<sub>2</sub> (1T'- $\text{FeI}_2$ ), and 2H-MoS<sub>2</sub>-like FeI<sub>2</sub> (2H- $\text{FeI}_2$ ). Overall, the calculations reveal several important results: (1) the square  $\text{Fe}_2\text{I}_2$  single-layer (SL) (shown in this work, denoted as S- $\text{Fe}_2\text{I}_2$ ) is indeed the ground state with the highest  $E_{coh}$ . (2) Similar to the reported 1T- $\text{FeI}_2$  [1-3], the 2H- $\text{FeI}_2$  SL shows an insulating electronic behavior and in-plane

magnetic orientation (MCA = -1.98 meV) with a dynamically stable crystal structure. (3) The 2D G-FeI and Si-FeI hexagonal structures are not stable because of the emergence of imaginary frequencies in the phonon spectra.

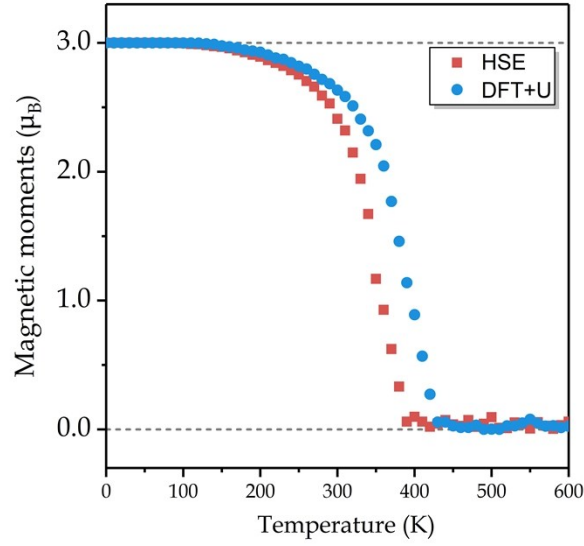

**Figure S3.** The magnetic moments variation of the Fe atom as functions of temperature by means of Monte Carlo simulations on the basis of 2D Heisenberg Hamiltonian model.

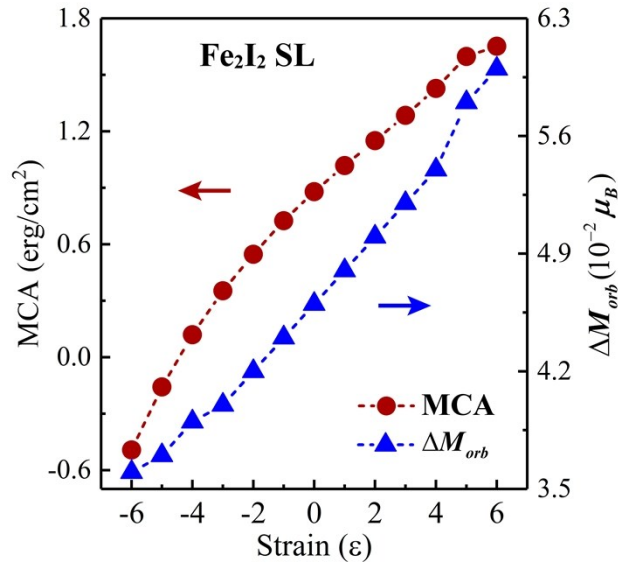

**Figure S4.** The variation of MCA and orbital moment anisotropy verse strain effect for Fe<sub>2</sub>I<sub>2</sub> SL.

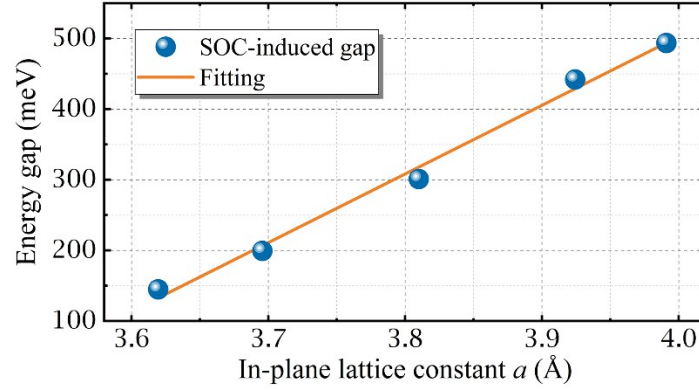

**Figure S5.** The SOC-induced energy gap of the 2D  $\text{Fe}_2\text{I}_2$  crystal as a function of biaxial strain effect.

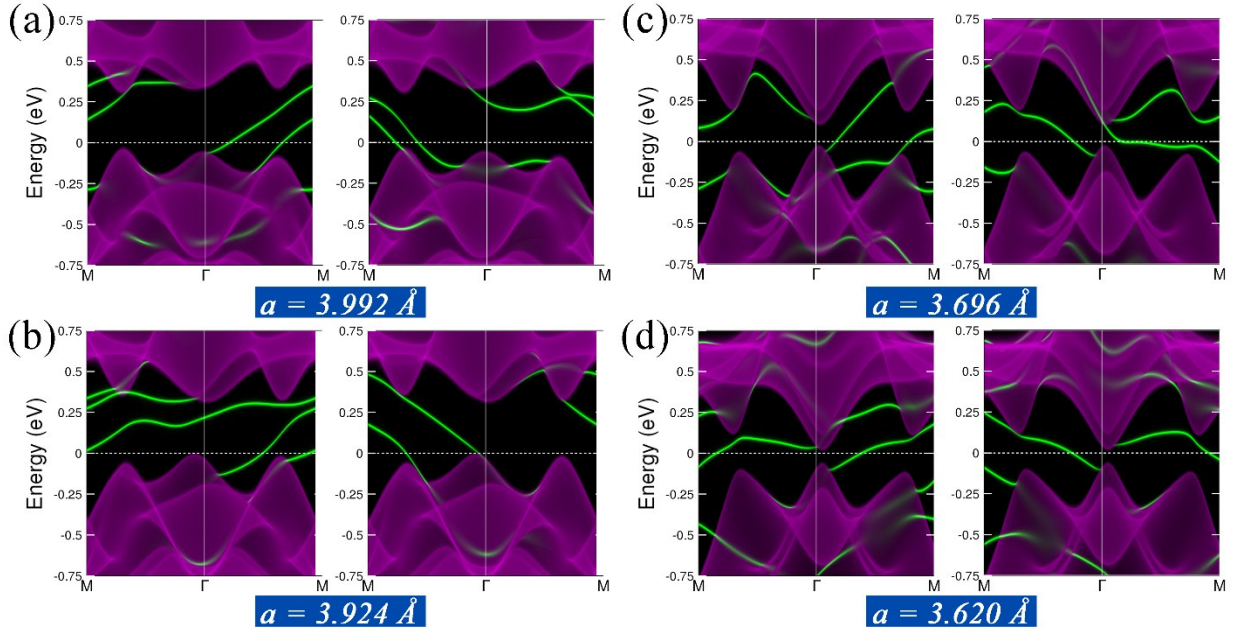

**Figure S6.** Band structure of the edges of  $\text{Fe}_2\text{I}_2$  ribbon as a function of in-plane lattice constants (a) 3.992 Å (4.65%), (b) 3.924 Å (3%), (c) 3.696 Å (-3%) and (d) 3.620 Å (-5%) with robust edge states, denoted by green, connecting the 2D valence and conduction bands.

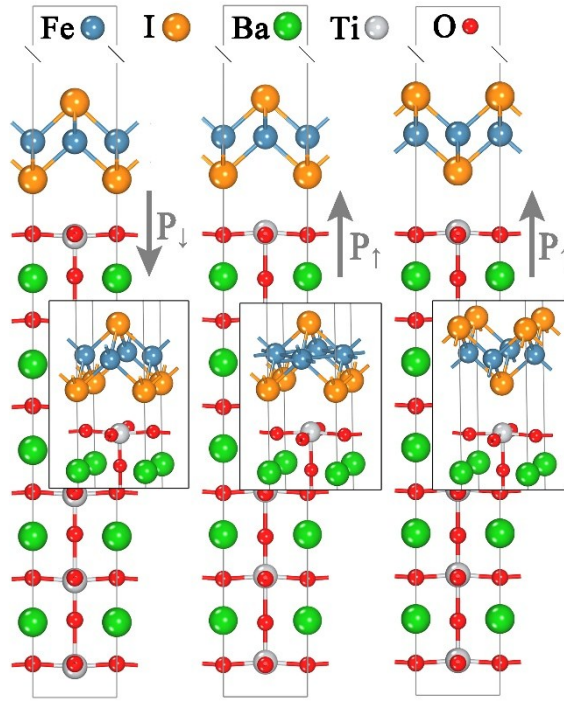

**Figure S7.** The proposed  $\text{Fe}_2\text{I}_2/\text{BTO}$  junctions consisting of  $\text{Fe}_2\text{I}_2$  SL on five unit cells of  $\text{BaTiO}_3$ . Blue, orange, green, gray and red spheres denote the Fe, I, Ba, Ti, and O atoms, respectively. The gray arrows show the polarization directions.

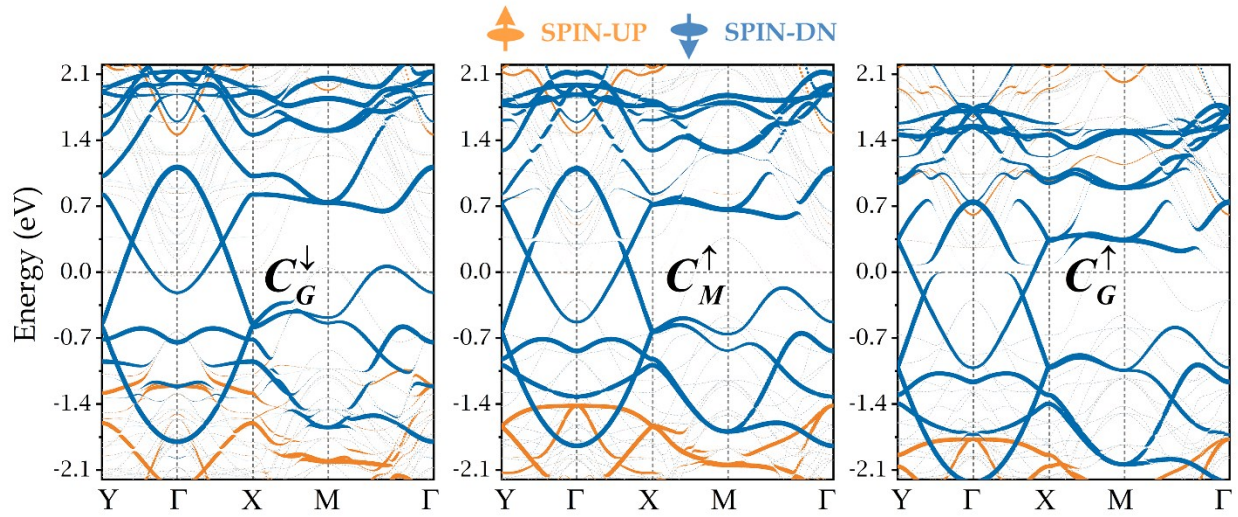

**Figure S8.** The  $\text{Fe}_2\text{I}_2$  layer-resolved band structure for the three different  $\text{Fe}_2\text{I}_2/\text{BTO}$  configurations, i.e.  $C_G^\downarrow$  (left panel),  $C_M^\uparrow$  (central panel), and  $C_G^\uparrow$  (right panel, respectively).



**The SOC energy difference** is defined as  $\Delta E_{SOC} = (E_{SOC}^{\rightarrow} - E_{SOC}^{\uparrow}) / 2$ , where

$$\begin{aligned}\Delta E_{SOC} &= \frac{\hbar^2}{2m^2 c^2} \left\langle \frac{1}{r} \frac{dV}{dr} \hat{\vec{L}} \cdot \hat{\vec{S}} \right\rangle \\ &= \sum_{I,lm\sigma' \sigma} \xi_{ll} \left\langle lm\sigma \left| \hat{\vec{L}} \cdot \hat{\vec{S}} \right| lm'\sigma' \right\rangle \rho_{mm',\sigma\sigma'}^{ll}\end{aligned}$$

Here,  $\rho_{mm',\sigma\sigma'}^{ll} = \frac{1}{N_k} \sum_{nk} \langle lm'\sigma' | nk \rangle \langle nk | lm\sigma \rangle f(\varepsilon_{nk})$ , where  $I$  is the atomic index,  $lm$  are the angular momentum orbitals,  $\sigma, \sigma'$  is the spin index,  $\xi_{ll}$  is the atomic SOC strength obtained from the spherical part of the effective potential,  $V(r)$ , within the PAW sphere,  $\rho_{mm',\sigma\sigma'}^{ll}$  is the density matrix projected on atomic orbitals,  $\hat{\vec{L}}$  and  $\hat{\vec{S}}$  are the orbital and spin operators, respectively.

**low-energy effective Hamiltonian:**

In the absence of SOC, the 2D Fe<sub>2</sub>I<sub>2</sub> SL hosts two pair of Dirac points along the  $k_x$  and  $k_y$  axes, locating at  $(\pm k_0, 0)$  and  $(0, \pm k_0)$ , respectively. We have constructed the low-energy effective  $k \cdot p$  Hamiltonian to describe the Dirac cones, for instance, for the ones denoted as  $D_1$  ( $D_2$ ) at  $(k_0, 0)$  ( $(0, k_0)$ ). At  $D_1$  ( $D_2$ ), the two relevant bands forming the Dirac point are labeled as  $\varphi_1$  and  $\varphi_2$ .

Under basis  $\Psi = (\varphi_1, \varphi_2)^T$ , the Hamiltonian can be expressed as

$$\begin{aligned}H_{D_1}(p_x, p_y) &= p_x \sigma_3 + p_y (\lambda_1 \sigma_1 + \lambda_2 \sigma_2) \\ H_{D_2}(p_x, p_y) &= p_y \sigma_3 + p_x (\lambda_1 \sigma_1 + \lambda_2 \sigma_2),\end{aligned}\tag{Eq. S1}$$

where  $\sigma_{1,2,3}$  are the Pauli Matrices and  $\lambda_{1,2}$  are real constants.

**References:**

1. M. A. McGuire, *Crystals*, 2017, **7**, 121.
2. M. Ashton, D. Gluhovic, S. B. Sinnott, J. Guo, D. A. Stewart and R. G. Hennig, *Nano Lett.*, 2017, **17**, 5251–5257.
3. A. S. Botana, and M. R. Norman, *Phys. Rev. Mater.*, 2019, **3**, 044001.
